# Supplementary material
Source: PubMed Central journal article supplement (PMC4038428)
Supplement: NIHMS524019-supplement-01.pdf [file NIHMS524019-supplement-01.pdf]

**Table 3:** Kaplan–Meier cumulative probability of open angle glaucoma-related blindness in at least one eye by either visual field or visual acuity criteria at different time intervals.

| Diagnosis year            | Probability of Blindness in At Least One Eye (95% CI) |                                       |                                      |
|---------------------------|-------------------------------------------------------|---------------------------------------|--------------------------------------|
|                           | 10-Year                                               | 15-year                               | 20-year                              |
| 1965-1970                 | 3.9 % (0.0-8.1)                                       | 7.2 % (0.8-13.2)                      | 15.3 % (5.3-24.2)                    |
| 1971-1975                 | 8.1 % (1.0-14.8)                                      | 20.0 % (8.5-30.0)                     | 28.9 % (14.0-41.2)                   |
| 1976-1980                 | 14.0 % (5.8-21.4)                                     | 27.6 % (15.9-37.8)                    | 32.6 % (19.3-43.8)                   |
| <b>Overall: 1965-1980</b> | <b>8.7 % (4.9-12.4)</b>                               | <b>18.2 % (12.4-23.5)</b>             | <b>25.8 % (18.5-32.5)</b>            |
| 1981-1985                 | 12.5 % (4.9-19.6)                                     | 14.6 % (6.0-22.5)                     | 17.2 % (7.2-26.1)                    |
| 1986-1990                 | 7.9 % (2.4-13.0)                                      | 7.9 % (2.4-13.0)                      | 11.9% (4.0-19.1)                     |
| 1991-1995                 | 5.3 % (1.4-9.1)                                       | 11.5 % (5.3-17.4)                     | *                                    |
| 1996-2000                 | 6.2 % (1.9-10.2)                                      | *                                     | *                                    |
| <b>Overall: 1981-2000</b> | <b>7.4 % (4.9-9.8)</b>                                | <b>10.8 % (7.4-14.0-)<sup>§</sup></b> | <b>13.5 % (8.8-17.9)<sup>§</sup></b> |

The probability was significantly higher in the 1965-1980 period compared with the 1981-2000 period. The 20-year probability of blindness in at least one eye was significantly higher for patients diagnosed in the 1965-1980 period compared with patients diagnosed in the 1981-2000 period for the 20-year (P=0.01) and 15-year (P=0.05) time periods, but not the 10-year time period (P=0.62).

\* Kaplan-Meier rate could not be calculated due to inadequate follow up time

<sup>§</sup> Significantly different than the 1965-1980 time period (logrank test)

CI – confidence interval
