# Supplementary material
Source: PubMed Central journal article supplement (PMC4038428)
Supplement: NIHMS524019-supplement-02.pdf [file NIHMS524019-supplement-02.pdf]

**Table 4:** Kaplan–Meier cumulative probability of open angle glaucoma-related blindness in at least one eye by visual acuity criteria (< 20/200) at different time intervals.

| Diagnosis year            | <i>Probability of Blindness In At Least One Eye By Visual Acuity Criteria (95% CI)</i> |                        |                          |
|---------------------------|----------------------------------------------------------------------------------------|------------------------|--------------------------|
|                           | <i>10-Year</i>                                                                         | <i>15-Year</i>         | <i>20-Year</i>           |
| 1965-1970                 | 1.3 % (0.0-3.8)                                                                        | 1.3 % (0.0-3.8)        | 7.9 % (0.0-15.2)         |
| 1971-1975                 | 4.9 % (0.0-10.1)                                                                       | 9.0 % (1.0-16.3)       | 12.6 % (1.9-22.2)        |
| 1976-1980                 | 4.8 % (0.1-9.3)                                                                        | 4.8 % (0.1-9.3)        | 11.4 % (1.0-20.6)        |
| <b>Overall: 1965-1980</b> | <b>3.6 % (1.1-6.0)</b>                                                                 | <b>4.8 % (1.8-7.7)</b> | <b>10.7 % (5.1-16.0)</b> |
| 1981-1985                 | 11.1 % (3.9-17.8)                                                                      | 13.2 % (5.0-20.8)      | 13.2 % (5.0-20.8)        |
| 1986-1990                 | 5.2 % (0.6-9.5)                                                                        | 5.2 % (0.6-9.5)        | 5.2 % (0.6-9.5)          |
| 1991-1995                 | 1.6 % (0.0-3.7)                                                                        | 4.8 % (0.5-8.9)        | *                        |
| 1996-2000                 | 3.1 % (0.0-6.1)                                                                        | *                      | *                        |
| <b>Overall: 1981-2000</b> | <b>4.5 % (2.5-6.4)</b>                                                                 | <b>6.7 % (4.0-9.4)</b> | <b>6.7 % (4.0-9.4)</b>   |

There was no significant difference in the probability of blindness in at least one eye by visual acuity criteria for patients diagnosed in the 1965-1980 period compared with patients diagnosed in the 1981-2000 period for any of the time periods (logrank test P= 0.73, 0.46, 0.60 for the 20-year, 15-year and 10-year time periods, respectively).

\* Kaplan-Meier rate could not be calculated due to inadequate follow up time

CI – confidence interval
